# Supplementary material
Source: ML conference proceedings conference paper supplement (https://proceedings.neurips.cc/paper_files/paper/2018/hash/5b8e4fd39d9786228649a8a8bec4e008-Abstract.html)
Supplement: Supplementary file [file 5b8e4fd39d9786228649a8a8bec4e008-Supplemental.zip]

# Supplementary Material for “Negotiable Reinforcement Learning for Pareto Optimal Sequential Decision-Making”

## 1 Proof of Lemma 2

**Stochastic policy assumption.** It is assumed that during the agent’s first action (or before it), the agent has the ability to generate and store some random numbers in the interval  $[0, 1]$ , called a random seed, that will not affect the environment except through other features of its actions. Then, given any two policies  $\pi$  and  $\pi'$  and a scalar  $p \in [0, 1]$  we may construct a third policy,

$$p\pi + (1 - p)\pi',$$

that decides with probability  $p$  (before receiving any inputs) to use policy  $\pi$  for generating all of its future actions, and otherwise uses policy  $\pi'$ . (This is a “once and for all” decision; the agent does not flip-flop between  $\pi$  and  $\pi'$  once the decision is made.) Mixtures of more than two policies are defined similarly. With this formalism, whenever  $\sum_k \alpha_k = 1$  and each  $\alpha_k \geq 0$ , we have

$$\mathbb{E}^{(j)} \left[ U^{(j)}; \sum_k \alpha_k \pi_k \right] = \sum_k \alpha_k \mathbb{E}_{\pi_k}^{(j)} [U^{(j)}]. \quad (1)$$

**Lemma 1.** *A policy  $\pi^*$  is Pareto optimal to principals 1 and 2 if and only if there exist weights  $w^{(1)}, w^{(2)} \geq 0$  with  $w^{(1)} + w^{(2)} = 1$  such that*

$$\pi^* \in \operatorname{argmax}_{\pi \in \Pi} \left( w^{(1)} \mathbb{E}_{\pi}^{(1)} [U^{(1)}] + w^{(2)} \mathbb{E}_{\pi}^{(2)} [U^{(2)}] \right) \quad (2)$$

*Proof.* The stochastic policy assumption gives the space of policies  $\Pi$  the structure of a convex space that the maps  $\mathbb{E}_{\pi}^{(j)} [U^{(j)}]$  respect by Equation 1. This ensures that the image of the map  $f : \Pi \rightarrow \mathbb{R}^2$  given by

$$f(\pi) := \left( \mathbb{E}_{\pi}^{(1)} [U^{(1)}], \mathbb{E}_{\pi}^{(2)} [U^{(2)}] \right)$$

is a closed, convex polytope. As such, a point  $(x, y)$  lies on the Pareto boundary of  $\operatorname{image}(f)$  if and only if there exist nonnegative weights  $(w^{(1)}, w^{(2)})$ , not both

zero, such that

$$(x, y) \in \operatorname{argmax}_{(x^*, y^*) \in \operatorname{image}(f)} \left( w^{(1)}x^* + w^{(2)}y^* \right)$$

After normalizing  $w^{(1)} + w^{(2)}$  to equal 1, this implies the result.  $\square$

## 2 NRL Agent Trajectories

In this section, we present the full trajectories taken by the agent in the deterministic and stochastic grid-world environments discussed in Section 4 of the main paper.

### 2.1 Full Trajectory in MDP 1

Depicted in Figure S1 is the agent’s trajectory in MDP 1, where the environment is deterministic and Goal 1 yields utility. The agent initially heads for Goal 2 in the top-right corner. However, at Frame 9 it has observed eight deterministic transitions in a row. Its confidence in MDP 1 is high enough at that point that it veers downward and heads to Goal 1.

### 2.2 Full Trajectory in MDP 2

Depicted in Figure S2 is the agent’s trajectory in MDP 2, where the environment is stochastic and Goal 2 yields utility. The agent immediately observes a stochastic transition, and its belief collapses onto MDP 2. It then moves directly to Goal 2, experiencing another stochastic transition at Frame 11.

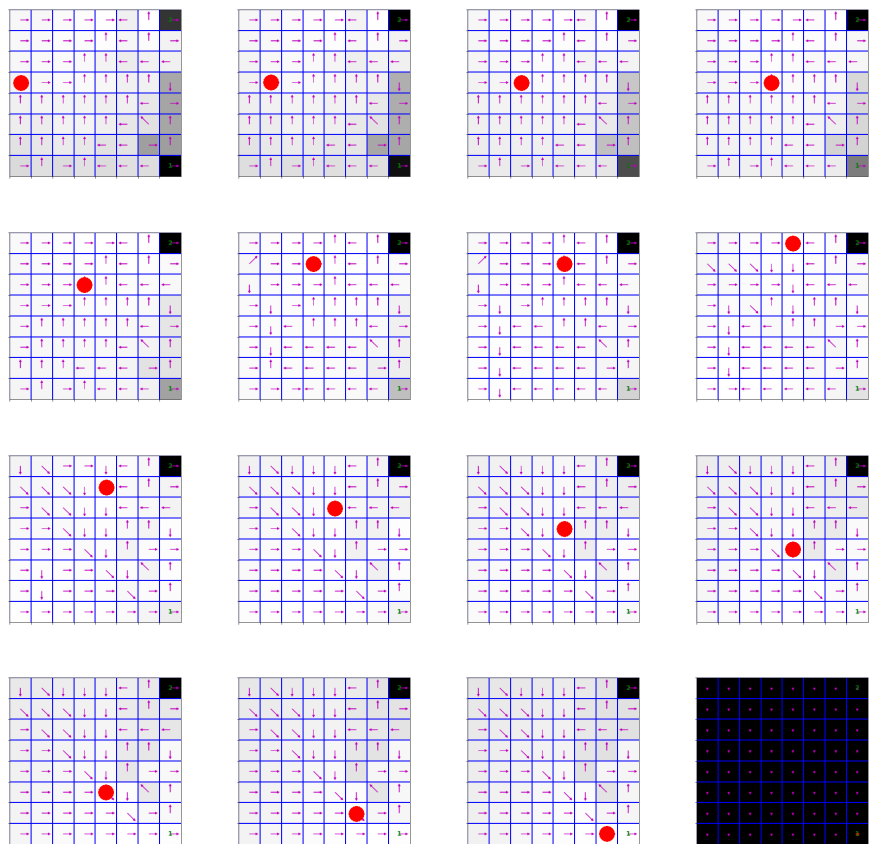

Figure S1

## References

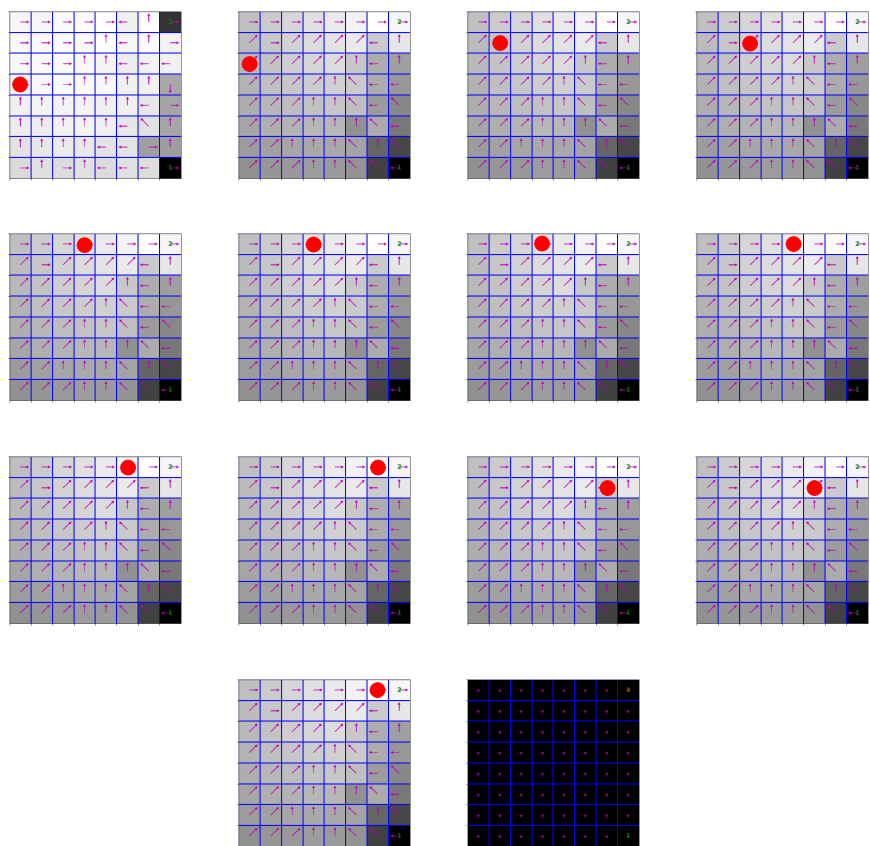

Figure S2
